# Supplementary material for: Microenvironmental Snail1-induced immunosuppression promotes melanoma growth
Source: PubMed Central journal article supplement (PMC10473961; doi:10.1038/s41388-023-02793-5), 2023-07-29

# SUPPLEMENTARY FIGURES AND LEGENDS

## Supplementary Figure 1 (Related to Figure 1)

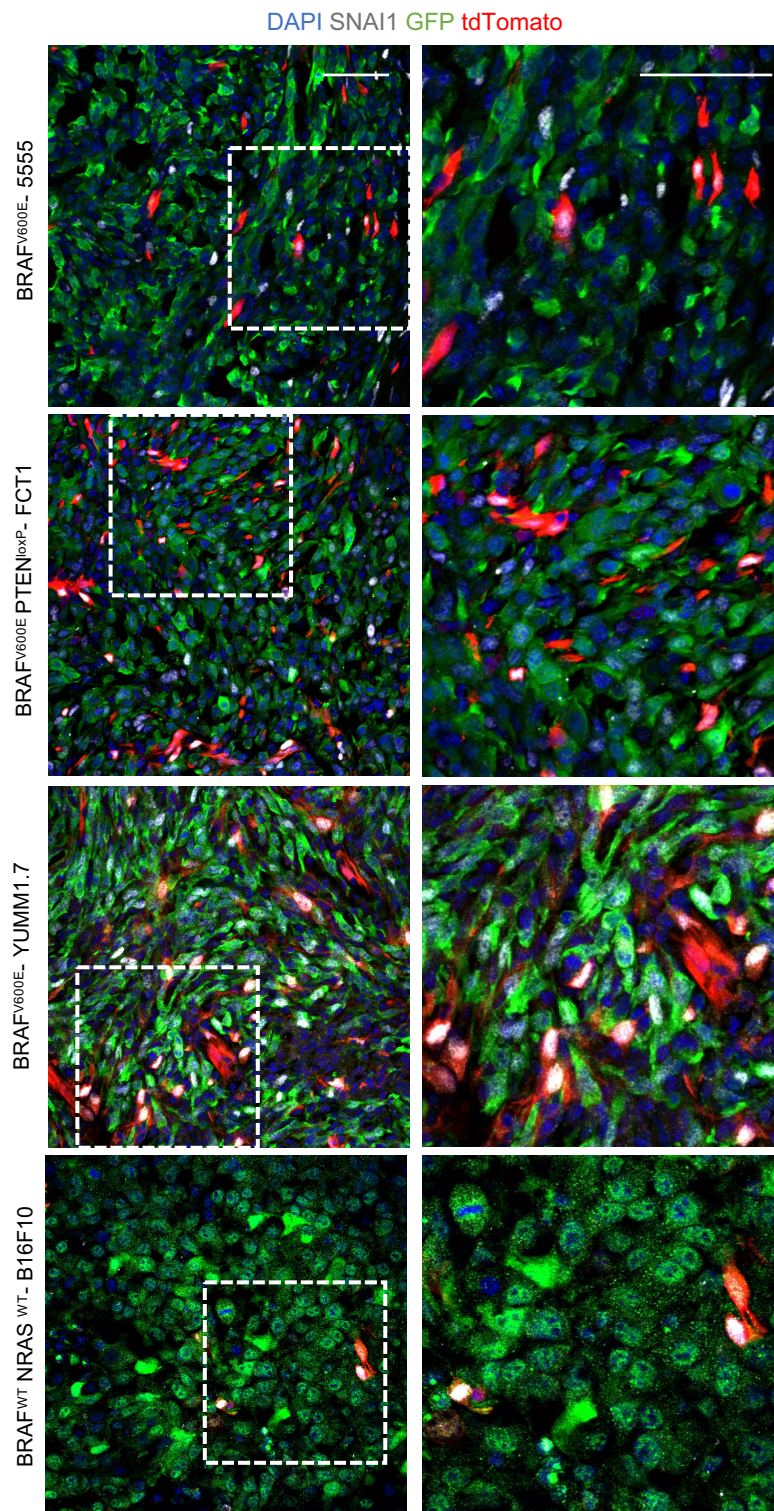

## Supplementary Figure 2 (Related to Figure 2)

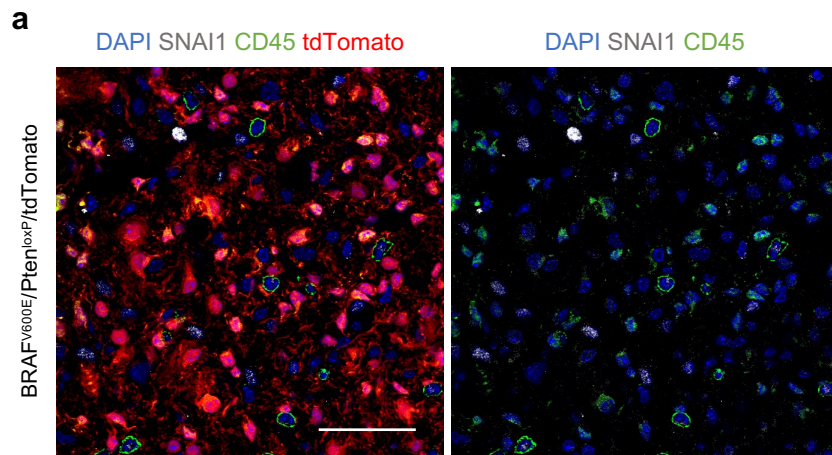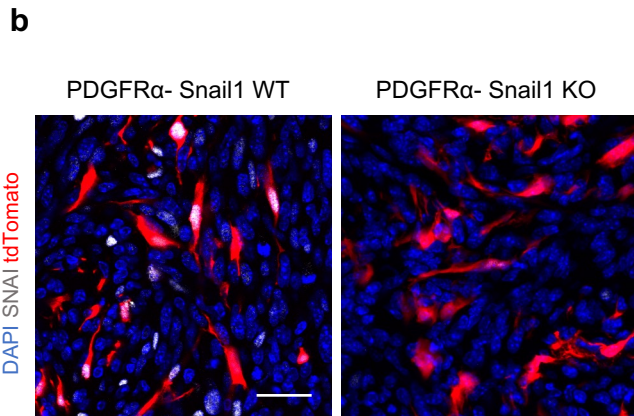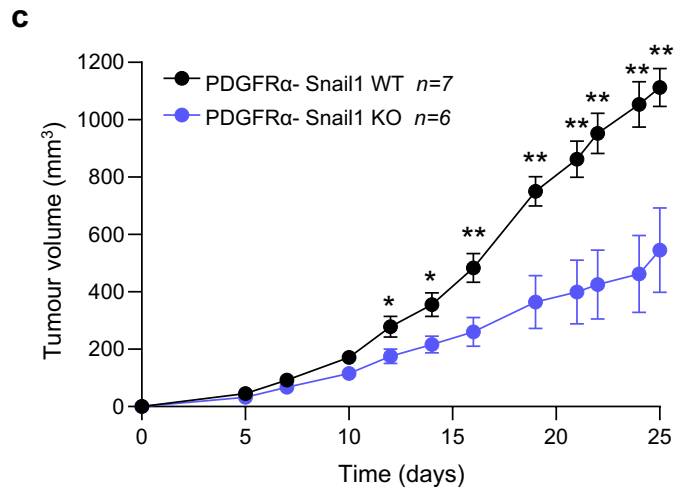

# Supplementary Figure 3 (Related to Figure 2)

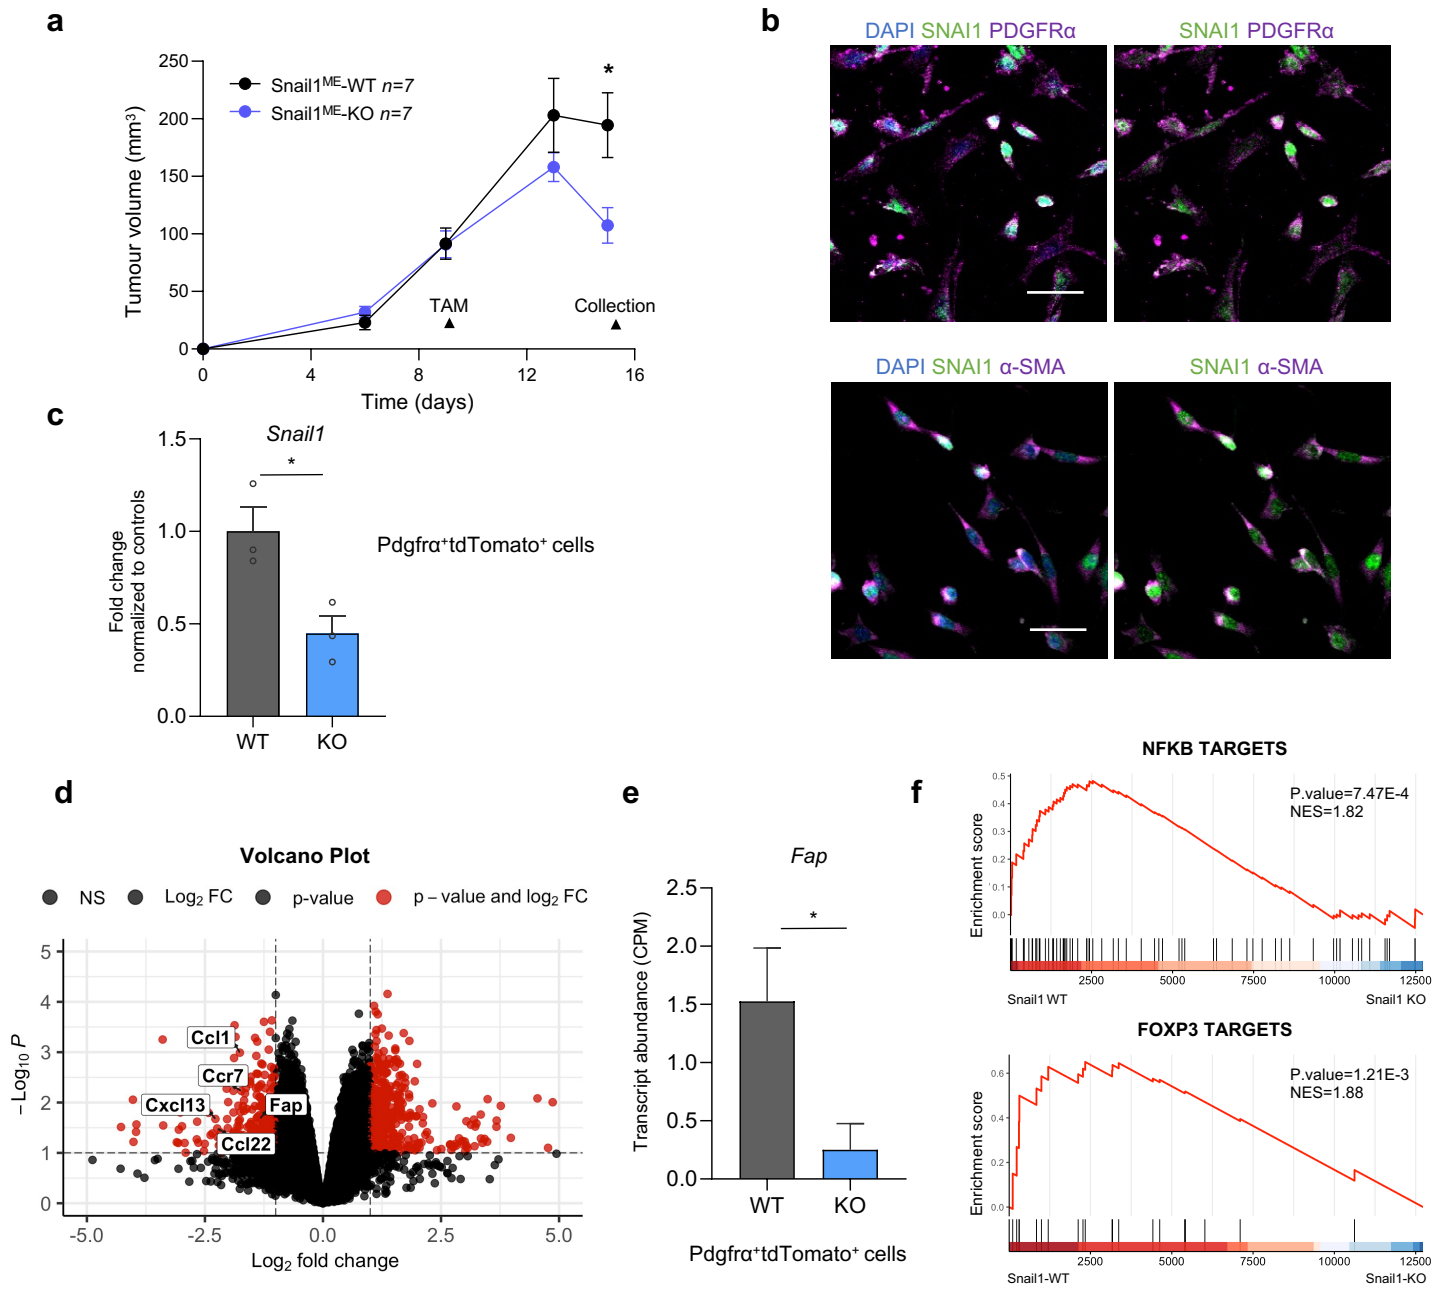

## Supplementary Figure 4 (Related to Figure 4)

### Correlation *Fap* vs *Snail1*

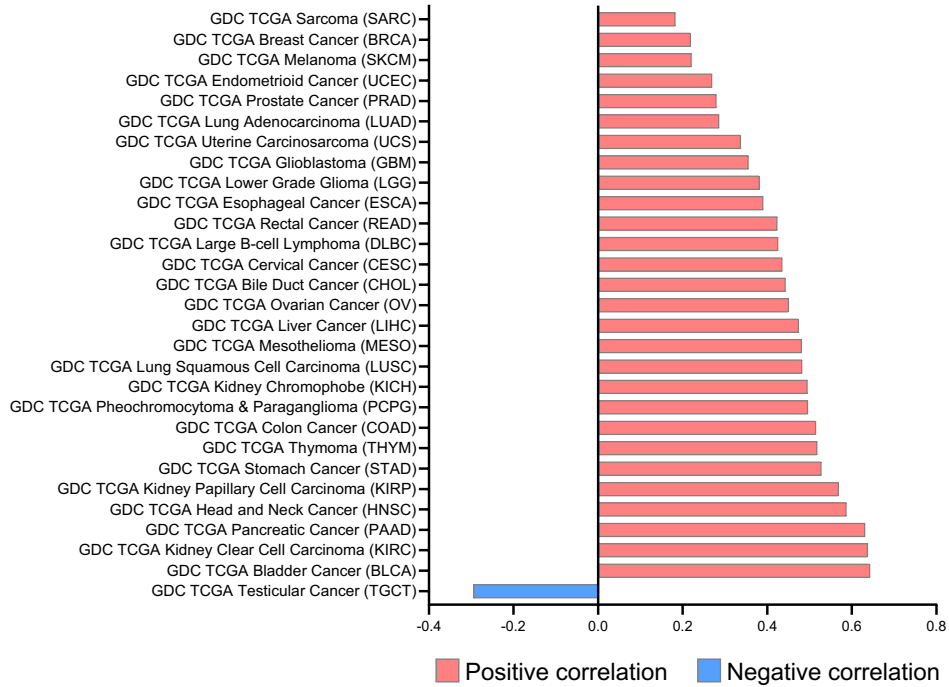



## Supplementary Figure 5 (Related to Figure 5)

BRAF<sup>V600E</sup>/Pten<sup>loxP</sup>/tdTomato Lung metastasis

DAPI SNAI1 PDGFR $\alpha$  tdTomato

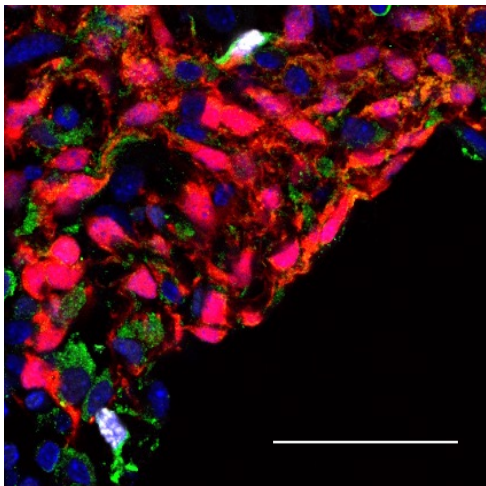

SNAI1 PDGFR $\alpha$

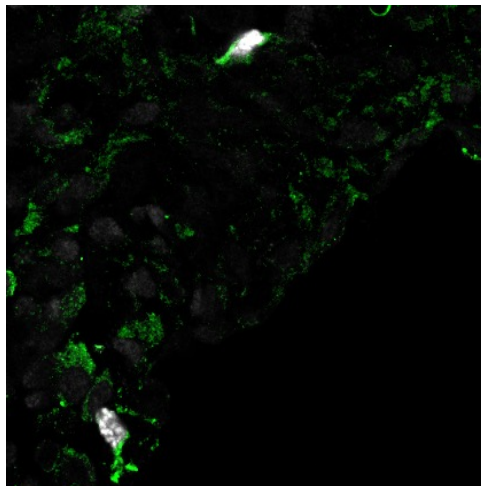

Supplement: 41388_2023_2793_MOESM1_ESM.pdf [file 41388_2023_2793_MOESM1_ESM.pdf]
